# Supplementary material
Source: PubMed Central journal article supplement (PMC9546916)
Supplement: 41467_2022_33632_MOESM1_ESM.pdf [file 41467_2022_33632_MOESM1_ESM.pdf]

# Supplementary Figure 1

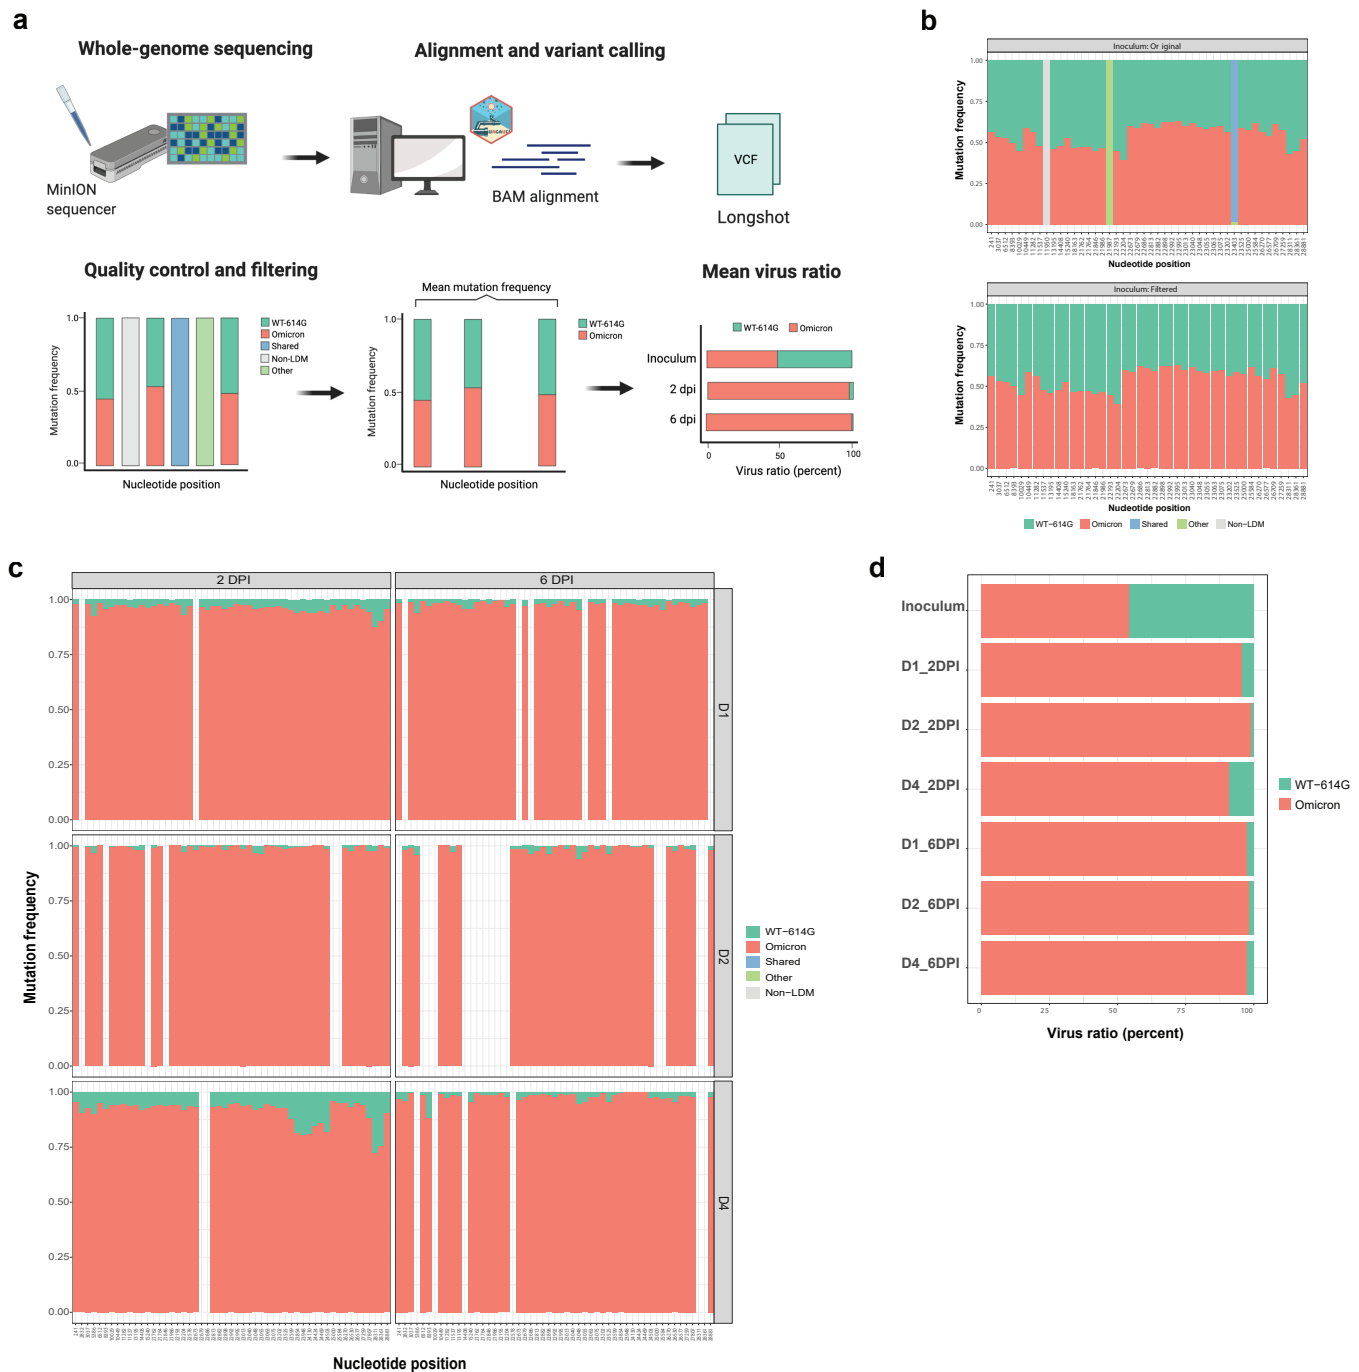

**Supplementary Fig. 1: Sequencing data analysis.** **a)** Schematic illustrating the general sequencing and bioinformatics workflow used to determine the virus ratios in Fig. 1e-g. For each virus mixture in the NEC, BEC, and lung explants samples, RNA was extracted from apical washes at 2 and/or 6 dpi and sequenced on the MinION sequencer using a modified version of the ARTIC protocol for SARS-CoV-2 sequencing (1200 bp amplicons with the midnight primer scheme, see methods for specific modifications)<sup>26</sup>. Live GPU basecalling was performed using Guppy v.5.1.15 (Oxford Nanopore technologies) in high-accuracy mode and the downstream analysis was performed using a modified version of the ARTIC bioinformatics pipeline (<https://artic.network/ncov-2019/ncov2019-bioinformatics-sop.html>). Briefly, input reads were filtered based on read length and then mapped to the Wuhan-Hu-1 reference genome (accession MN908947.3 [[www.ncbi.nlm.nih.gov/bioproject/?term=MN908947.3](http://www.ncbi.nlm.nih.gov/bioproject/?term=MN908947.3)]) using the ‘artic minion’ command. BAM alignment files from the ARTIC pipeline were then used for variant calling in longshot (v.0.4.4) with an input VCF file containing VOC Delta and Omicron-BA.1 mutations provided to call variants at specific nucleotide sites. The downstream analysis of VCF files was performed in R v.4.1.3 and involved filtering the VCF file for each sample to exclude mutations shared between both viruses in the mixture (shared, blue), non-lineage-defining mutations (non-LDM, grey), and any sites with overlapping mutations in both viruses that were difficult to call (other, green). Mutations called with a depth of coverage lower than 100 were also excluded from the downstream analysis (bottom left panel). Mutations in filtered VCF files (bottom middle panel) were then used to calculate the mean mutation frequency for each virus per sample. Finally, the mean  $\pm$  sd virus ratio was calculated for each time point (bottom right panel). **b)** Stacked bar plot showing the frequency of individual mutations called in the VCF file for the WT-614G and Omicron inoculum before (top) and after (bottom) filtering. **c)** Stacked bar plot showing the frequency of individual mutations in the filtered VCF files for all WT-614G and Omicron NEC samples (3 donors, 2 and 6 dpi). These values were used to calculate a mean mutation frequency for each virus per sample, which is shown in **d)**.

## Supplementary Figure 2

**a**

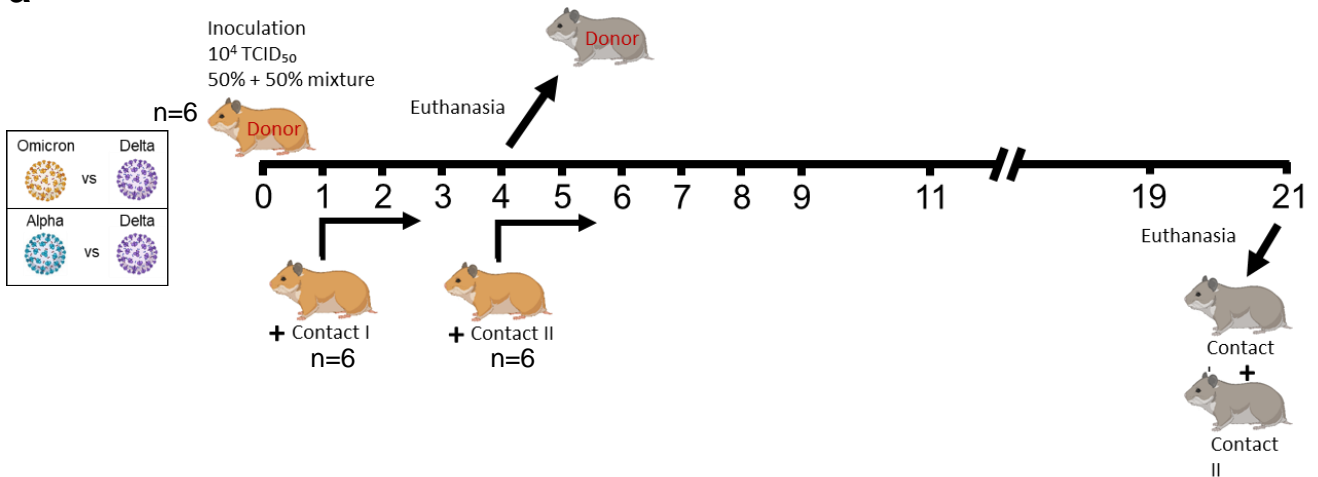

**b**

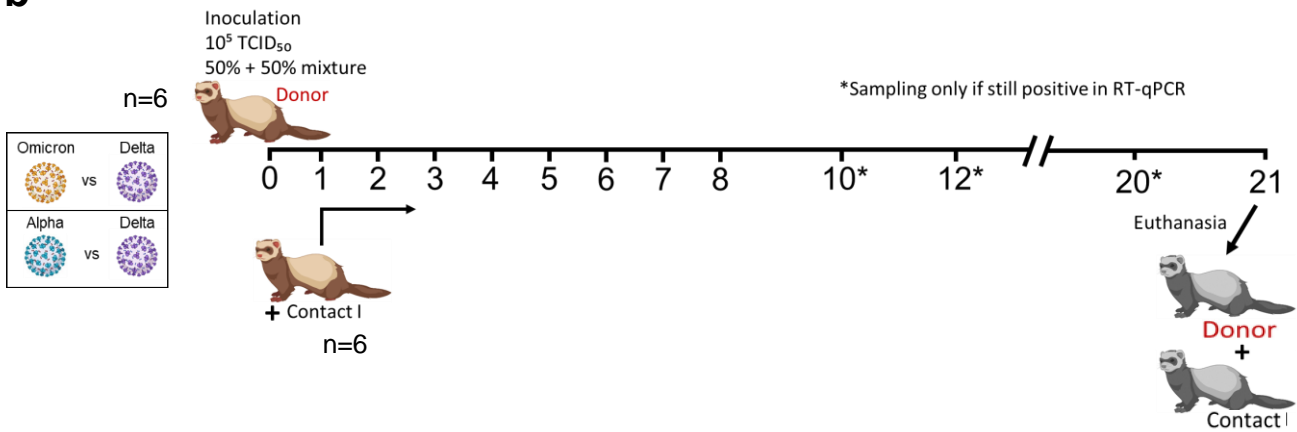

**c**

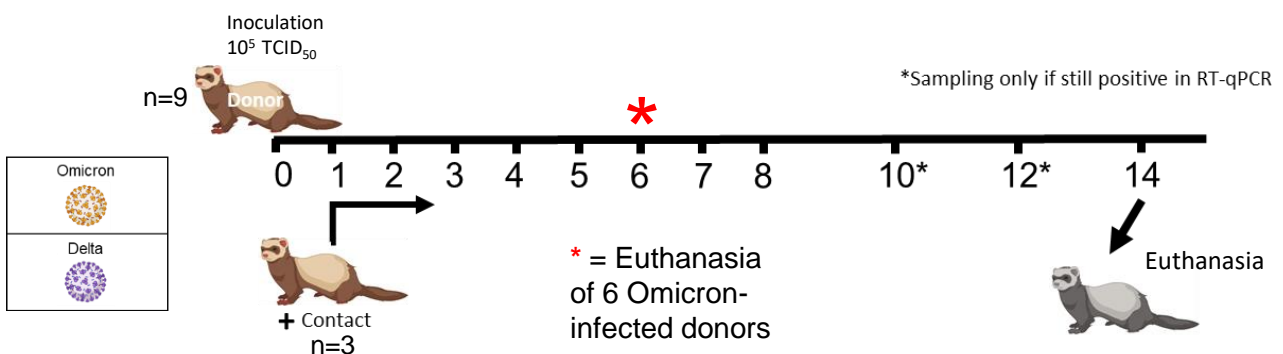

**Supplementary Fig. 2: Experimental outline for studies with Syrian hamsters and ferrets.** Donor hamsters (n=6) were intranasally inoculated with either an Omicron-BA.1, -Delta or an Alpha-Delta mixture at iso-titer. A Competition studies in hamsters. Each donor was co-housed with one contact I hamster 1dpi. 4dpi after euthanasia of the donors, one contact II hamster was introduced to each contact I hamster. B Study outline for the ferret competition studies with Omicron-BA.1-Delta and Alpha-Delta mixtures. C Timeline for the ferret study with single-variant-inocula (either Omicron-BA.1 or Delta). 6dpi six donor animals, which were inoculated with Omicron-BA.1, were euthanized for determination of viral organ load in URT and LRT.

# Supplementary Figure 3

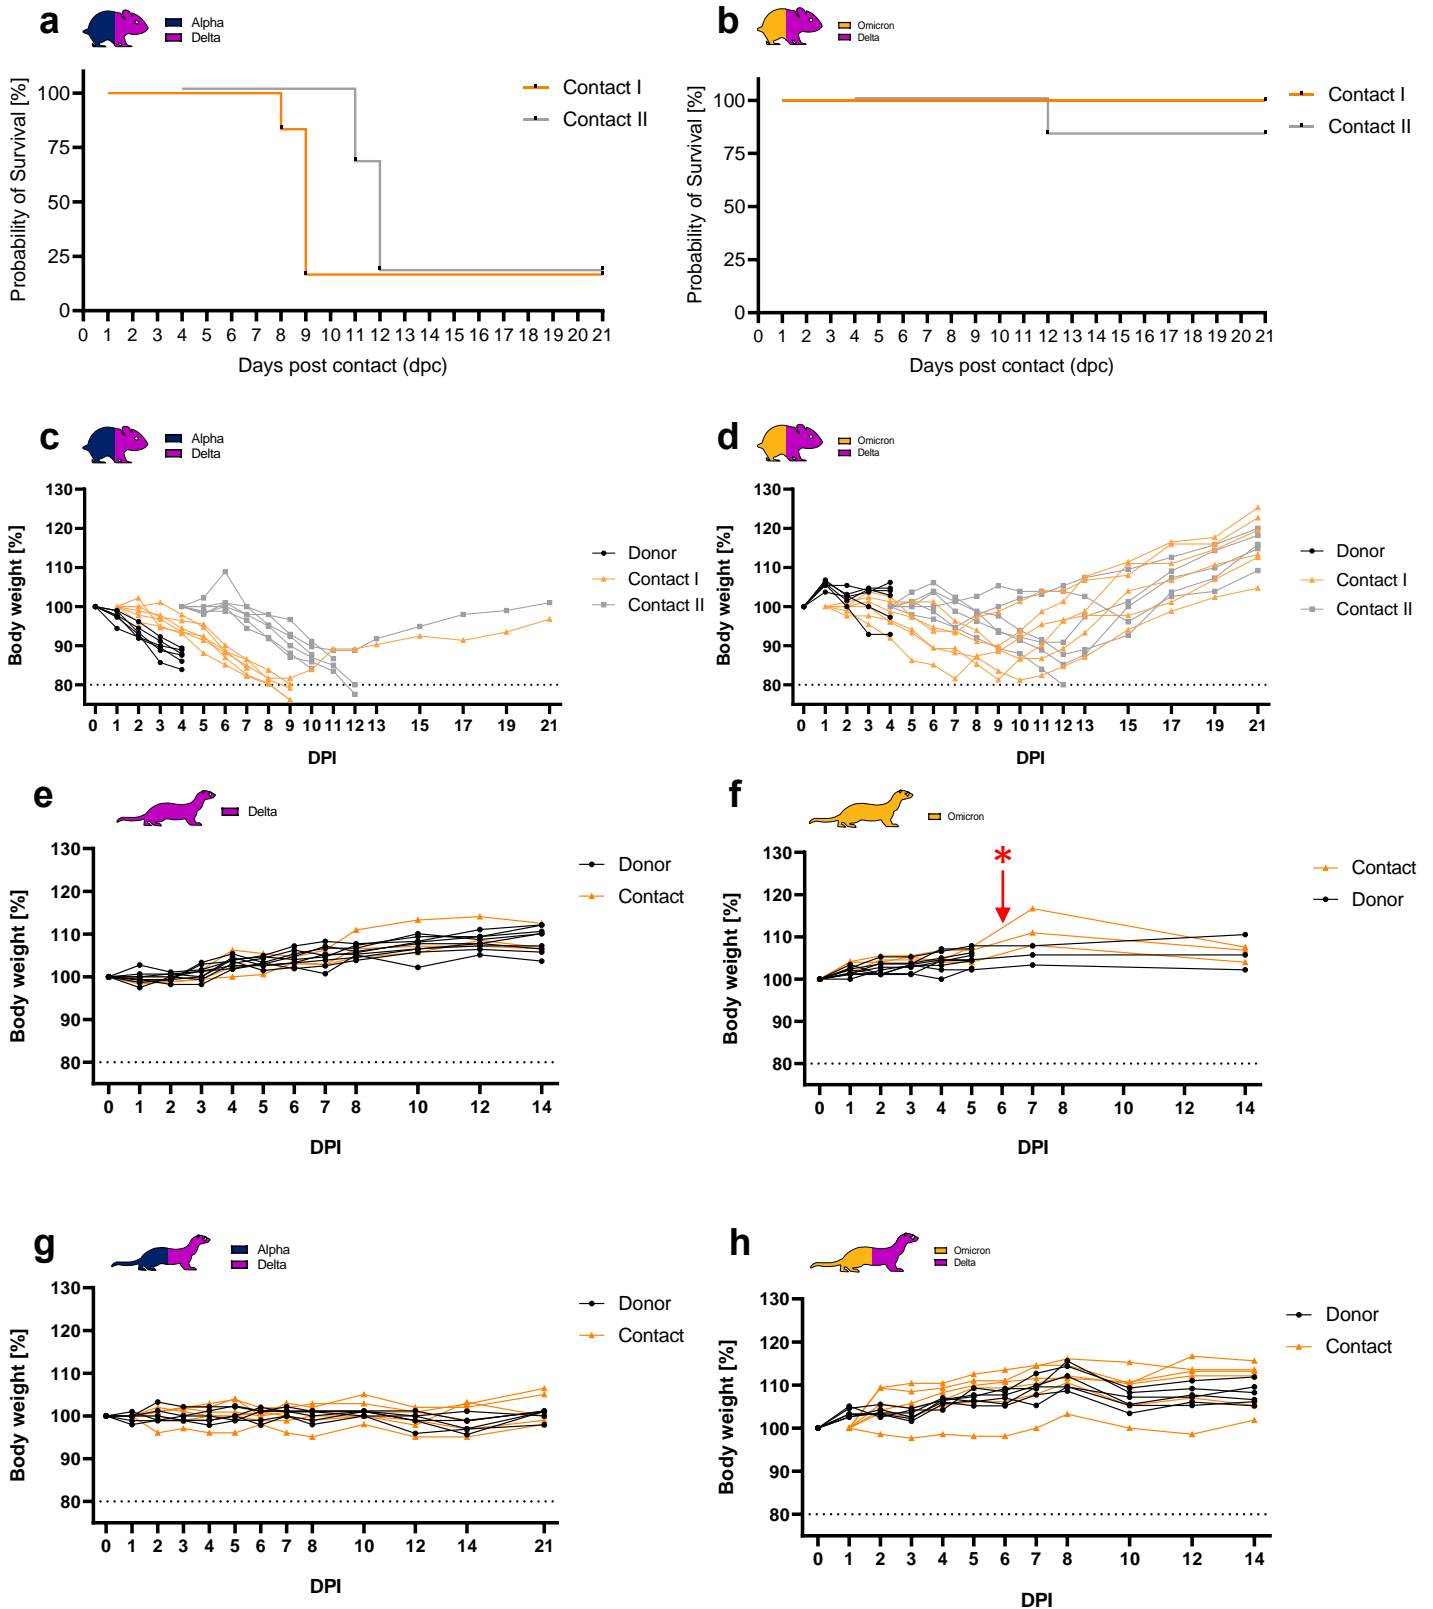

**Supplementary Fig. 3: Body weight changes and survival rate of hamsters/ferrets in the competitive infection and transmission experiments.** a) Survival of Syrian hamsters during competitive infection and transmission experiment between Alpha and Delta VOC. b) Survival of Syrian hamsters during competitive infection and transmission experiment between Delta and Omicron-BA.1 VOC. c) Percentages of body weight change in Syrian hamsters competitively inoculated with Alpha and Delta VOC. d) Percentages of body weight change in Syrian hamsters competitively inoculated with Delta and Omicron-BA.1 VOC. e) Percentages of body weight change in ferrets during single infection study with Delta VOC. f) Percentages of body weight change in ferrets during single infection study with Omicron-BA.1 VOC. Red star and arrow show timepoint of euthanasia (6 dpi) for six ferrets to analyze viral load distribution in organs. g) Percentages of body weight change in ferrets competitively inoculated with Alpha and Delta VOC. h) Percentages of body weight change in ferrets competitively inoculated with Delta and Omicron-BA.1 VOC.

# Supplementary Figure 4

## Inoculum

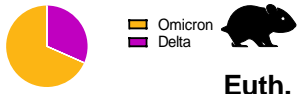

|        |            | Euth.  | Concha      | Trachea     | Lung caudal | Lung medial | Lund cranial |
|--------|------------|--------|-------------|-------------|-------------|-------------|--------------|
| Cage 1 | Contact I  | 20 dpc | 1.5E+04<br> | <LOD<br>    | <LOD<br>    | <LOD<br>    | <LOD<br>     |
|        | Contact II | 8 dpc  | 1.2E+07<br> | 1.8E+04<br> | 2.0E+05<br> | 7.1E+04<br> | 6.7E+05<br>  |
| Cage 2 | Contact I  | 20 dpc | 1.0E+03<br> | <LOD<br>    | <LOD<br>    | <LOD<br>    | <LOD<br>     |
|        | Contact II | 17 dpc | 5.8E+03<br> | <LOD<br>    | 1.1E+03<br> | <LOD<br>    | <LOD<br>     |
| Cage 3 | Contact I  | 20 dpc | 1.5E+03<br> | <LOD<br>    | 3.3E+03<br> | <LOD<br>    | <LOD<br>     |
|        | Contact II | 17 dpc | <LOD<br>    | <LOD<br>    | <LOD<br>    | <LOD<br>    | <LOD<br>     |
| Cage 4 | Contact I  | 20 dpc | 1.7E+03<br> | <LOD<br>    | <LOD<br>    | <LOD<br>    | <LOD<br>     |
|        | Contact II | 17 dpc | 2.8E+03<br> | <LOD<br>    | <LOD<br>    | <LOD<br>    | 1.8E+03<br>  |
| Cage 5 | Contact I  | 20 dpc | 5.5E+03<br> | <LOD<br>    | <LOD<br>    | <LOD<br>    | 1.4E+03<br>  |
|        | Contact II | 17 dpc | <LOD<br>    | <LOD<br>    | 1.6E+03<br> | <LOD<br>    | <LOD<br>     |
| Cage 6 | Contact I  | 20 dpc | 1.6E+03<br> | <LOD<br>    | 2.1E+03<br> | <LOD<br>    | <LOD<br>     |
|        | Contact II | 17 dpc | 1.7E+03<br> | <LOD<br>    | 2.8E+03<br> | <LOD<br>    | <LOD<br>     |

**Supplementary Fig. 4: Viral load in organs of Contact I and Contact II hamsters competitively inoculated with Delta and Omicron-BA.1 VOC at respective euthanasia timepoints** Viral genome load in upper (URT) and lower (LRT) respiratory tract tissues of Syrian hamsters in the competitive transmission experiment between SARS-CoV-2 VOCs Delta and Omicron-BA.1. Syrian hamsters were inoculated with comparable genome equivalent mixture of Delta and Omicron-BA.1 VOC. Absolute quantification was performed by RT-qPCR analysis of tissue homogenates of Contact I and Contact II hamsters in relation to a set of defined standards. Tissue samples were collected at euthanasia (Euth.). Pie chart colors illustrate the ratio of variants detected in each sample at the indicated dpi or days post contact (dpc). Pie chart sizes are proportional to the total viral genome copies reported above. Grey pies indicate values below the LOD ( $<10^3$  viral genome copies per mL).

# Supplementary Figure 5

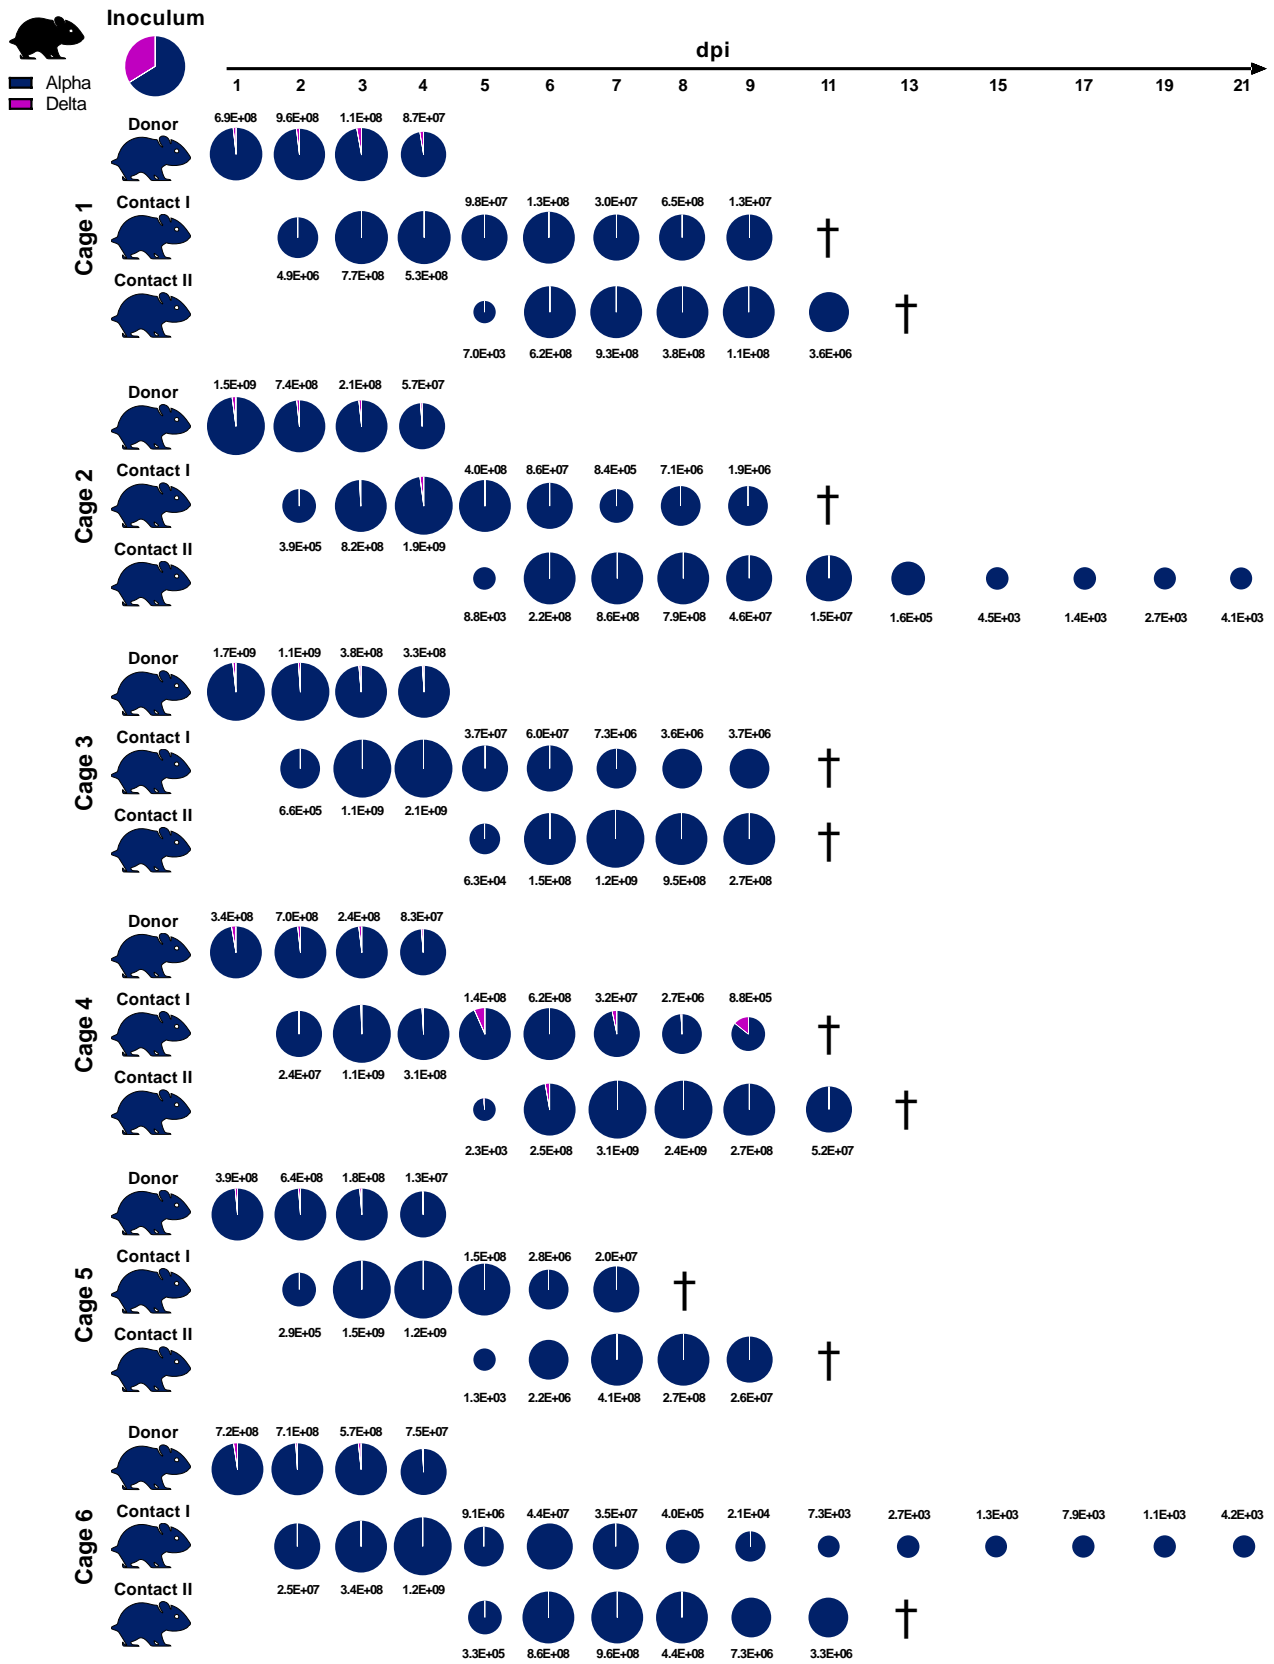

**Supplementary Fig. 5: Competitive infection of hamsters with SARS-CoV-2 Delta and Alpha** Six donor hamsters were each inoculated intranasally with  $10^{4.625}$  TCID<sub>50</sub> determined by back titration and composed of a mixture of SARS-CoV-2 Alpha (dark blue) and Delta (purple) at 1.95:1 ratio determined by back-titration of the original single virus amounts used in the experiment. Donor hamsters, contact I and II hamsters were co-housed sequentially as shown in Supplementary Data Fig.2. Nasal washings were performed daily from 1-9 dpi and afterwards every two days until 21 dpi. Each pie chart illustrates the ratio of the respective viruses in nasal washings for each sampling day. Total genome copies/mL are indicated above or below the respective pies. Hamster silhouettes are colored according to the dominant variant (>66%) detected in the latest sample of each animal. Black crosses indicate the respective animal was already dead.

# Supplementary Figure 6

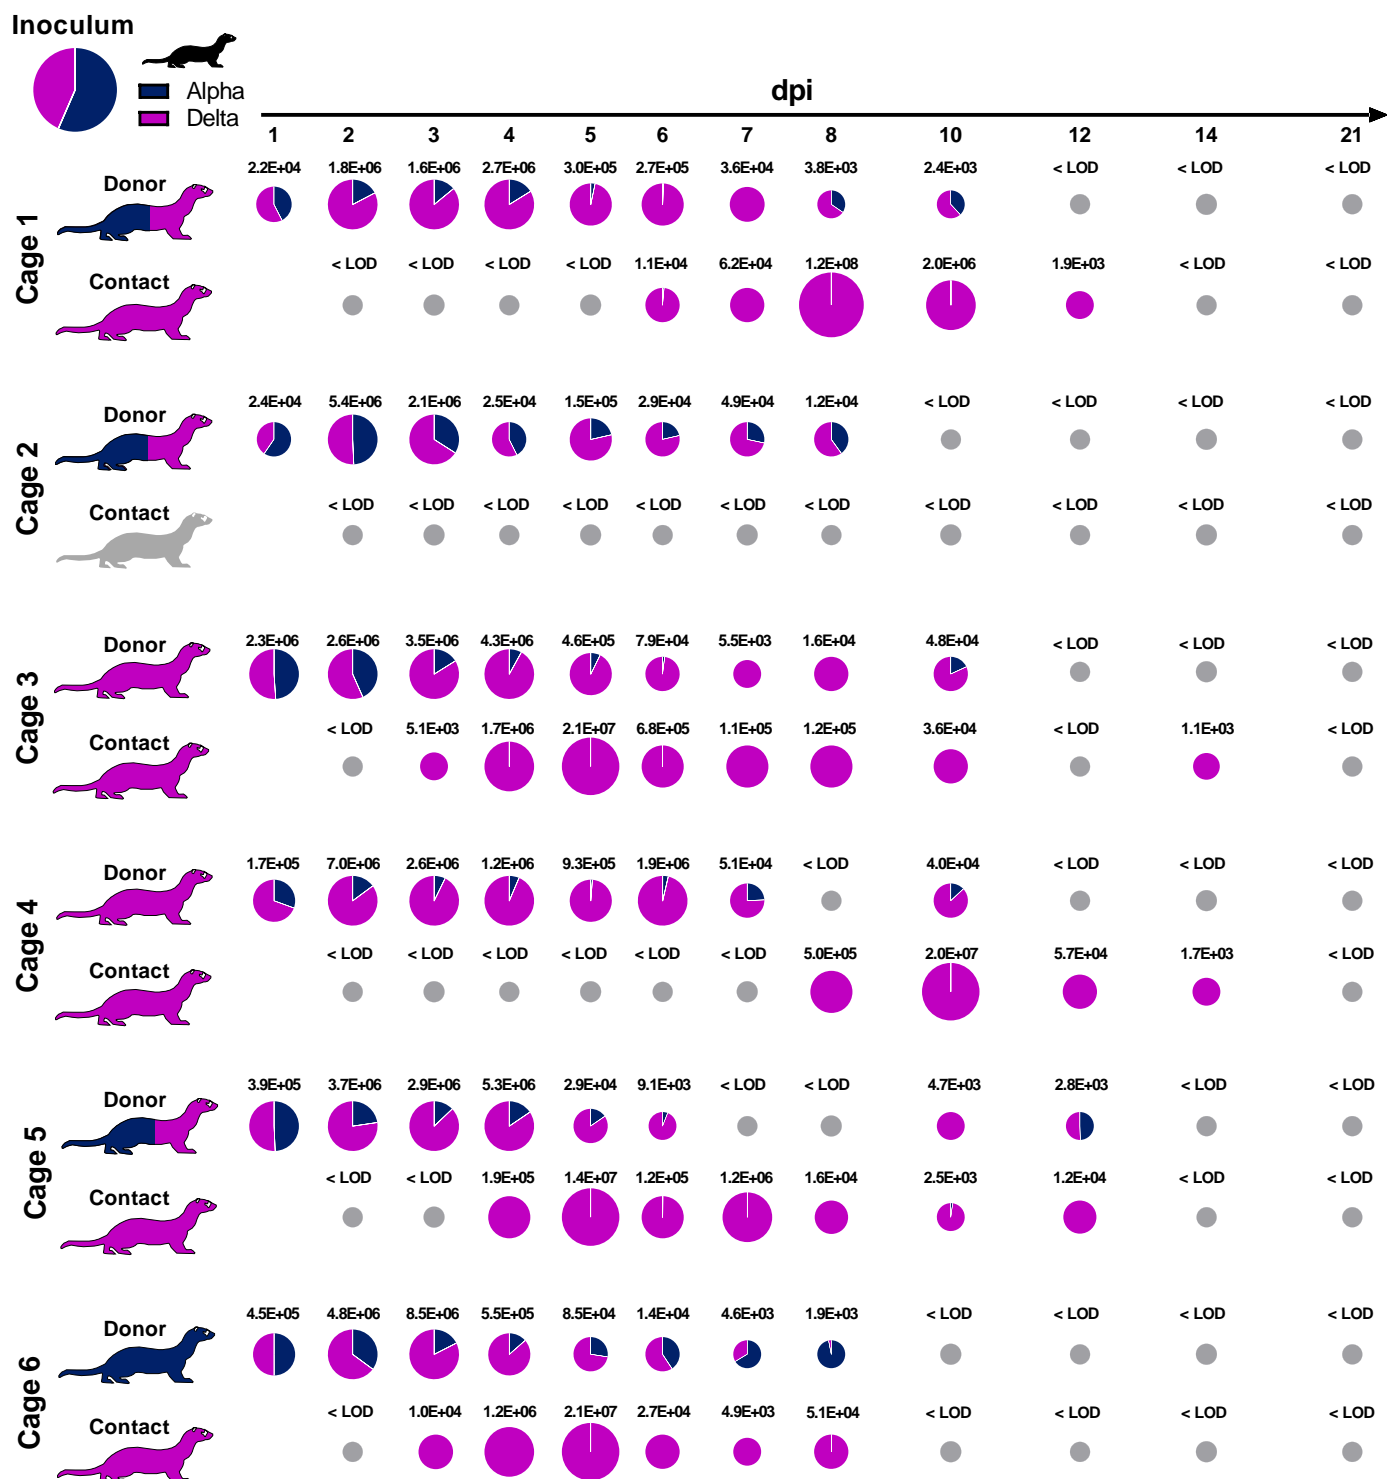



**Supplementary Fig. 6: Competitive infection of ferrets with SARS-CoV-2 Alpha and Delta**

Six donor ferrets were each inoculated with  $10^5$  TCID<sub>50</sub> determined by back titration and composed of a mixture of Alpha (dark blue) and SARS-CoV-2 Delta (purple) at a 1.33:1 ratio determined by back-titration of the original single virus amounts used in the experiment. Donor and Contact ferrets were co-housed sequentially as shown in Supplementary Data Fig.2. Pie charts illustrate the ratio of either SARS-CoV-2 Alpha or SARS-CoV-2 Delta detected in nasal washings of the donor or contact ferrets in the respective ferret groups at indicated dpi. Viral genome copies/mL are shown above or below respective pie charts; Grey pies indicate values below the LOD ( $<10^3$  viral genome copies per mL). Coloring of the ferret silhouettes refers to the predominant SARS-CoV-2 variant ( $>66\%$ ) detected in the latest sample of the respective animal.

## Supplementary Figure 7

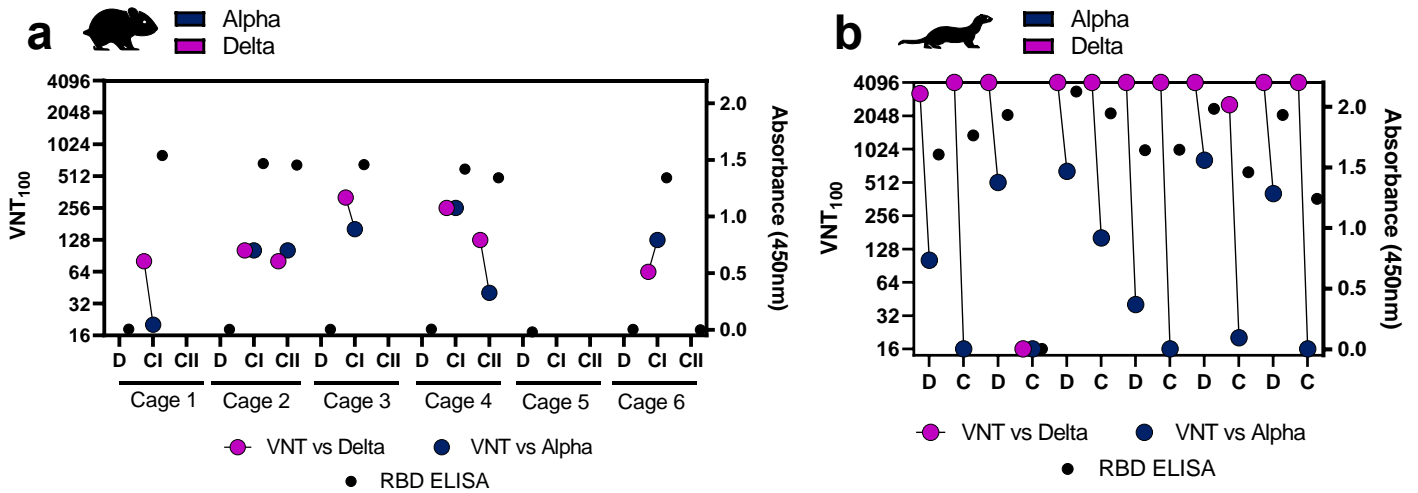

**Supplementary Fig. 7: ELISA and VNT100 of sera received from competitive infection experiments with Alpha and Delta in hamsters/ferrets.** Blue dots represent neutralization of Alpha variant, purple dots represent neutralization of the Delta variant in the respective animal according to the highest dilution where virus neutralization was visible (left Y-Axis). Black dots show RBD-ELISA-reactivity of animal sera at respective euthanasia timepoint (right Y-Axis) (a) VNT100 and RBD-ELISA from animal sera of the Alpha vs Delta competitive infection and transmission experiment in hamsters (b) VNT100 and RBD-ELISA from animal sera of the competitive infection and transmission experiment with Delta and Alpha VOC in ferrets.

# Supplementary Figure 8

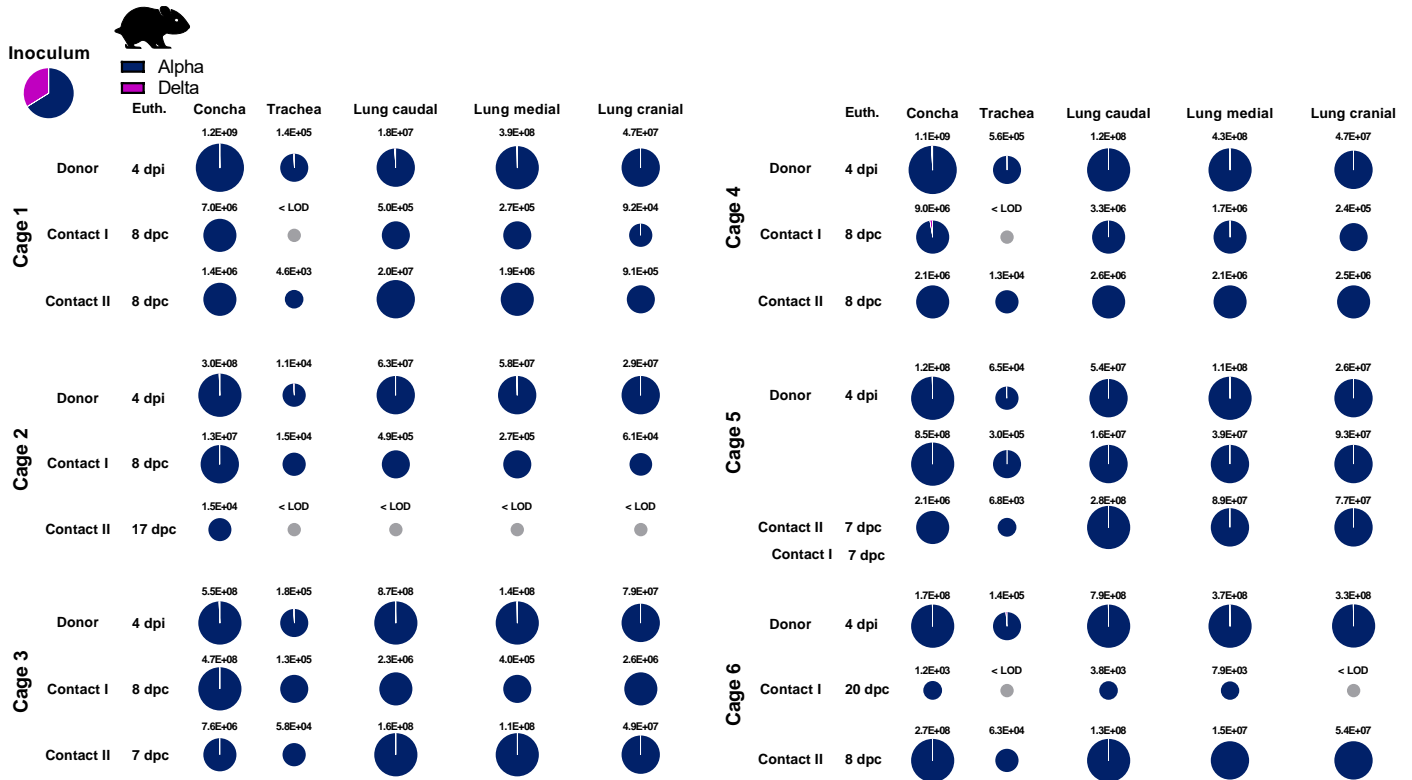

**Supplementary Fig. 8: Viral load in organs of Donor, Contact I and Contact II hamsters competitively inoculated with Alpha and Delta VOC at respective euthanasia timepoints.** Viral genome load in upper (URT) and lower (LRT) respiratory tract tissues of Syrian hamsters in the competitive transmission experiment between SARS-CoV-2 VOCs Alpha and Delta. Syrian hamsters were inoculated with comparable genome equivalent mixture of either Alpha or Delta VOC. Absolute quantification was performed by RT-qPCR analysis of tissue homogenates of donor, contact I and contact II hamsters in relation to a set of defined standards. Tissue samples were collected at euthanasia (Euth.). Pie chart colors illustrate the ratio of variants detected in each sample at the indicated dpi or days post contact (dpc). Pie chart sizes are proportional to the total viral genome copies reported above. Grey pies indicate values below the LOD ( $<10^3$  viral genome copies per mL).

## Supplementary Figure 9

### a Single infections with Delta and Omicron

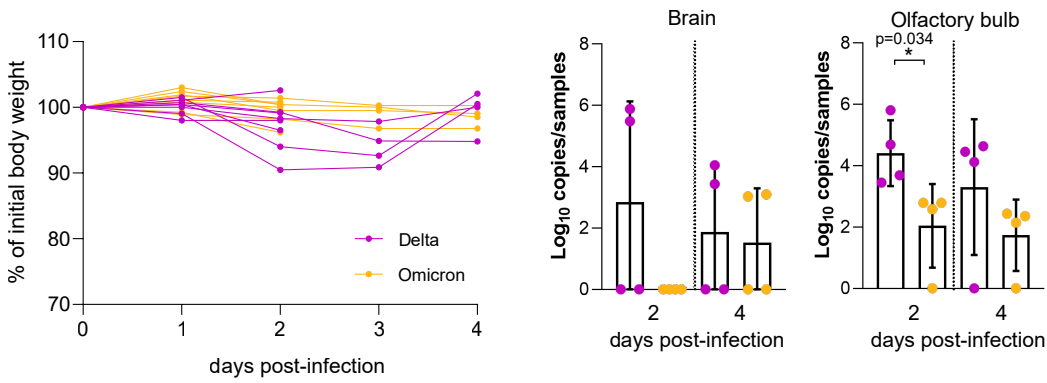

### b Competition experiments with Delta, Omicron, S-Delta and S-Omicron

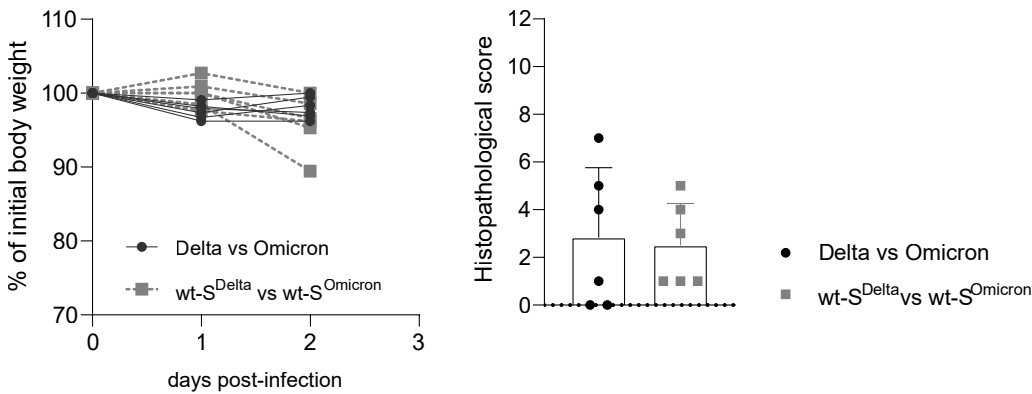

**Supplementary Fig. 9: Delta spike mutations drive enhanced fitness in humanized mice.** **a)** hACE2-KI mice (7 to 16 week-old male) were intranasally inoculated with  $10^{4.3}$  tissue culture infectious dose 50 (TCID<sub>50</sub>) of Delta or Omicron isolates. The left graph reports the body weight loss for each of the hACE2-KI in Fig. 3a. The right graph depicts the viral copies in brain and olfactory bulb samples quantified using E-gene probe-specific RT-qPCR. Data are mean  $\pm$  s.d. from the indicated number of biological replicates from a single experiment. Statistical significance was determined using an unpaired two-tailed Student t-test; \*\*P < 0.01. **b)** hACE2-KI mice (7 to 19 week-old female, n=6/group) were intranasally inoculated with  $10^4$  TCID<sub>50</sub> of a 1:1 mix of Delta and Omicron or SARS-CoV-2<sup>S-Delta</sup> and SARS-CoV-2<sup>S-Omicron</sup>. The graph on the left shows the body weight loss for each of the inoculated animal. The graph on the right shows the histopathological score in these mice. Data are mean  $\pm$  s.d. from the indicated number of biological replicates from a single experiment.

# Supplementary Figure 10

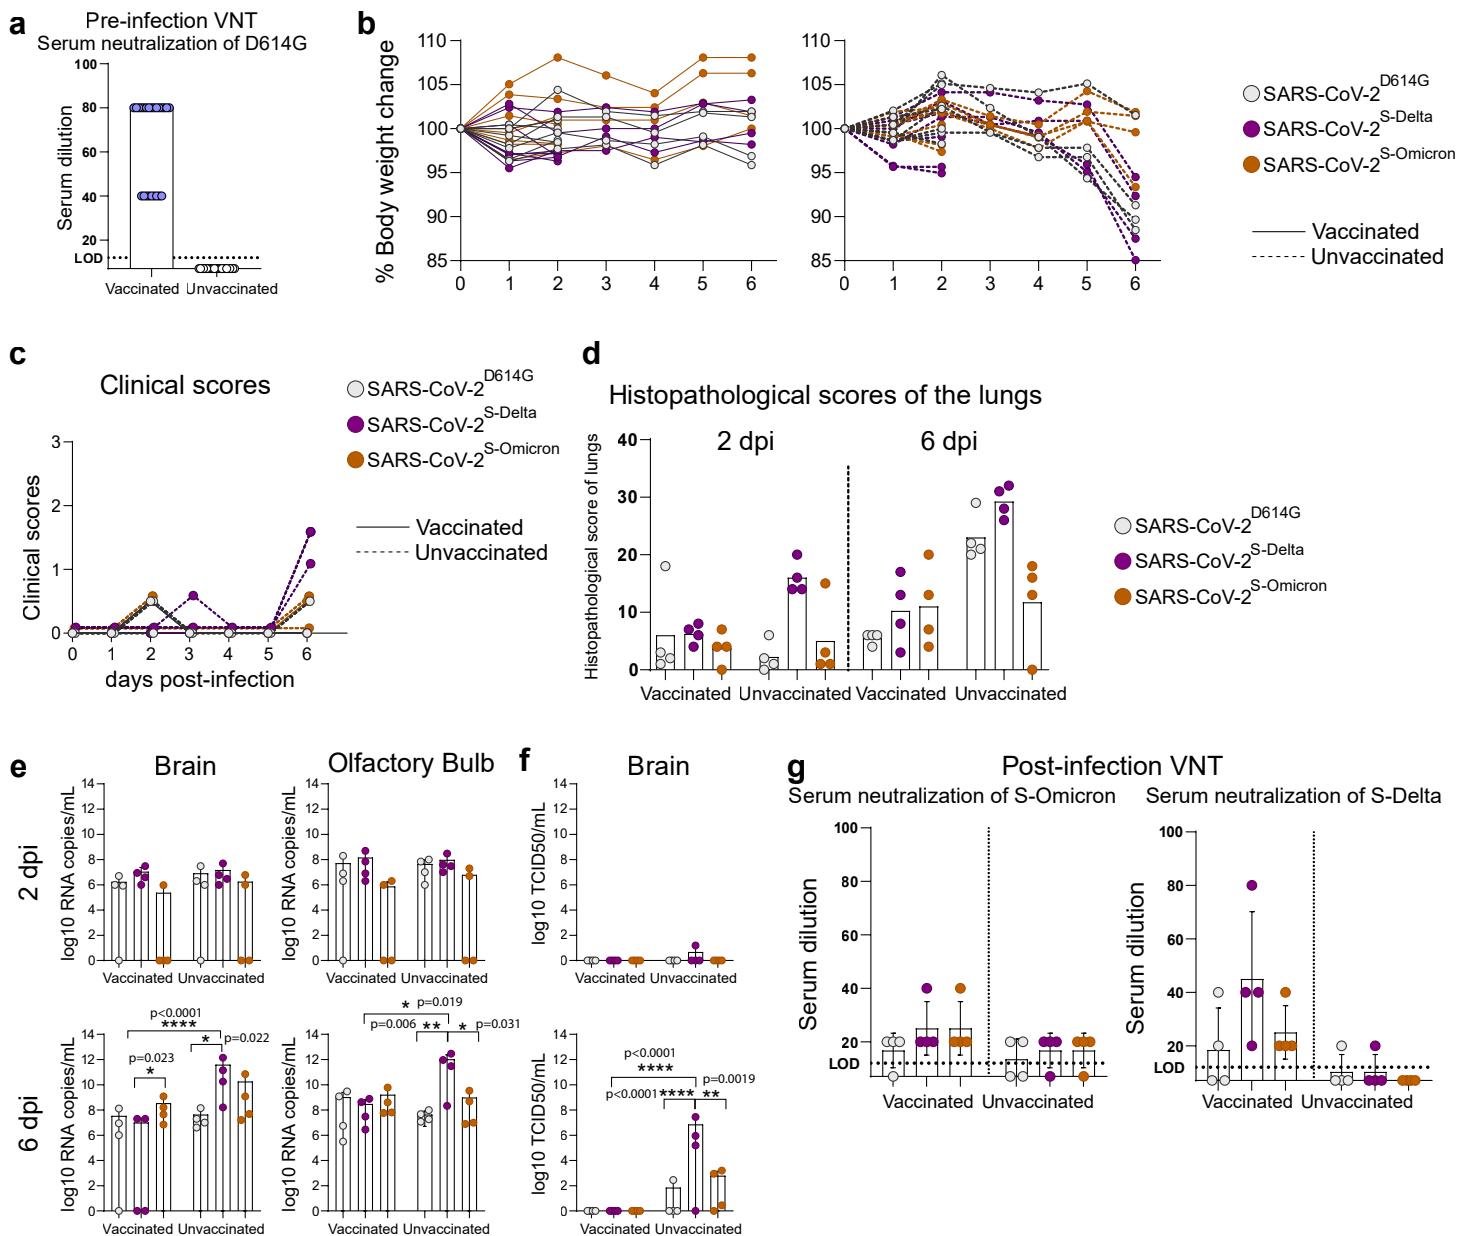

**Supplementary Fig. 10: mRNA vaccine induced reduction in replication and pathogenesis of SARS-CoV-2 clones in K18-hACE2 transgenic mice.** **a)** Female K18-hACE2 transgenic mice (7 to 15 weeks old,  $n=16$  mice) were immunized intramuscularly with a single dose of  $1 \mu\text{g}$  of mRNA-Vaccine Spikevax (Moderna). After two weeks the neutralizing antibody titers against SARS-CoV-2<sup>D614G</sup> were determined. Later, mice were ( $n=8$  mice/group) intranasally inoculated with  $10^4$  tissue culture infectious dose 50 (TCID<sub>50</sub>) of SARS-CoV-2<sup>D614G</sup>, SARS-CoV-2<sup>S-Delta</sup> and SARS-CoV-2<sup>S-Omicron</sup>. **b)** The body weight change and **c)** the clinical scores of the mice were monitored daily. **d)** Histopathological scores were given to evaluate the severity of the lung pathology. **e)** Brain and olfactory bulb samples of the infected mice were collected at 2 or 6 days post-infection (dpi) to determine the viral load ( $n=4$  for each group). Viral RNA-dependent RNA polymerase (RdRp) gene copies of brain and olfactory bulb tissues were quantified using probe-specific RT-qPCR. **f)** Infectious virus titers from the brain samples were determined using TCID<sub>50</sub> assays in VeroE6/TMPRSS2 cells. **g)** Virus neutralization capacities of the serum collected from infected mice at 6 dpi are tested against SARS-CoV-2<sup>S-Delta</sup> and SARS-CoV-2<sup>S-Omicron</sup> clones. Each dot in the graphs represents one animal, and the bars show mean values  $\pm$  SD. The color key in b also applies to c, d, e and f. Statistical significance was determined using ordinary two-way ANOVA (a–d) and P values were adjusted using Tukey’s multiple-comparison test; \* $P < 0.05$ , \*\* $P < 0.01$ , \*\*\* $P < 0.001$ , \*\*\*\* $P < 0.0001$ . Data were obtained from one experiment. Each data point represents one biological replicate.

## Supplementary Information Guide

1. **Supplementary Information Table 1:** List of the viruses used in the experiments.
2. **Supplementary Information Table 2:** Histopathological characterization of hACE-2-KI mice infected with Delta or Omicron-BA.1 isolates
3. **Supplementary Information Table 3:** Histopathological characterization of K18-hACE2 mice infected with SARS-CoV-2<sup>S-Delta</sup> or SARS-CoV-2<sup>S-Omicron</sup>
4. **Supplementary Information Table 4:** Primer Pairs for Delta and Omicron.
5. **Supplementary Information Table 5:** Primers and probes for viral RNA detection via RT-qPCR.

# Supplementary Information Table 1

| SARS-CoV-2                      | Reference                                                                                           | Model              | Inocula                                                                                                                                                                                                                                                     |
|---------------------------------|-----------------------------------------------------------------------------------------------------|--------------------|-------------------------------------------------------------------------------------------------------------------------------------------------------------------------------------------------------------------------------------------------------------|
| SARS-CoV-2 <sup>D614G</sup>     | <a href="https://doi.org/10.1038/s41586-021-03361-1">https://doi.org/10.1038/s41586-021-03361-1</a> | hACE2-K18 mice     | SARS-CoV-2 <sup>D614G</sup> Single                                                                                                                                                                                                                          |
|                                 |                                                                                                     | hNEC/hBEC          | SARS-CoV-2 <sup>D614G</sup> Single<br>SARS-CoV-2 <sup>D614G</sup> vs Delta<br>SARS-CoV-2 <sup>D614G</sup> vs Omicron-BA.1<br>SARS-CoV-2 <sup>D614G</sup> vs SARS-CoV-2 <sup>S-Delta</sup><br>SARS-CoV-2 <sup>D614G</sup> vs SARS-CoV-2 <sup>S-Omicron</sup> |
| Alpha                           | EPI_ISL_751799                                                                                      | Hamster and ferret | Alpha vs Delta                                                                                                                                                                                                                                              |
| Delta                           | EPI_ISL_1760647                                                                                     | Ferret             | Delta Single                                                                                                                                                                                                                                                |
|                                 |                                                                                                     | Hamster and ferret | Alpha vs Delta<br>Delta vs Omicron-BA.1                                                                                                                                                                                                                     |
|                                 |                                                                                                     | hNEC/hBEC          | Delta Single<br>SARS-CoV-2 <sup>D614G</sup> vs Delta<br>Delta vs Omicron-BA.1<br>Delta vs SARS-CoV-2 <sup>S-Delta</sup>                                                                                                                                     |
|                                 | EPI_ISL_2535433                                                                                     | hACE2-KI mice      | Delta Single<br>Delta vs Omicron-BA.1                                                                                                                                                                                                                       |
| Omicron-BA.1                    | EPI_ISL_6959868                                                                                     | Ferret             | Omicron-BA.1 Single                                                                                                                                                                                                                                         |
|                                 |                                                                                                     | Hamster and ferret | Delta vs Omicron-BA.1                                                                                                                                                                                                                                       |
|                                 | EPI_ISL_7062525                                                                                     | hACE2-KI mice      | Omicron-BA.1 Single<br>Delta vs Omicron-BA.1                                                                                                                                                                                                                |
|                                 |                                                                                                     | hNEC/hBEC          | Omicron-BA.1 Single<br>SARS-CoV-2 <sup>D614G</sup> vs Omicron-BA.1<br>Delta vs Omicron-BA.1<br>Omicron-BA.1 vs SARS-CoV-2 <sup>S-Omicron</sup>                                                                                                              |
| SARS-CoV-2 <sup>S-Delta</sup>   | Backbone:<br>NCBI Reference<br>Sequence: Wuhan-Hu-1<br>NC_045512.2<br><br>Spike:<br>EPI_ISL_5769545 | hACE2-KI mice      | SARS-CoV-2 <sup>S-Delta</sup> vs SARS-CoV-2 <sup>S-Omicron</sup>                                                                                                                                                                                            |
|                                 |                                                                                                     | NEC/BEC            | SARS-CoV-2 <sup>S-Delta</sup> Single<br>SARS-CoV-2 <sup>D614G</sup> vs SARS-CoV-2 <sup>S-Delta</sup><br>Delta vs SARS-CoV-2 <sup>S-Delta</sup><br>SARS-CoV-2 <sup>S-Delta</sup> vs SARS-CoV-2 <sup>S-Omicron</sup>                                          |
|                                 |                                                                                                     | PCLS               | SARS-CoV-2 <sup>S-Delta</sup> vs SARS-CoV-2 <sup>S-Omicron</sup>                                                                                                                                                                                            |
|                                 |                                                                                                     | hACE2-KI mice      | SARS-CoV-2 <sup>S-Delta</sup> vs SARS-CoV-2 <sup>S-Omicron</sup>                                                                                                                                                                                            |
| SARS-CoV-2 <sup>S-Omicron</sup> | Backbone:<br>NCBI Reference<br>Sequence: Wuhan-Hu-1<br>NC_045512.2<br><br>Spike:<br>EPI_ISL_7062525 | hACE2-KI mice      | SARS-CoV-2 <sup>S-Delta</sup> vs SARS-CoV-2 <sup>S-Omicron</sup>                                                                                                                                                                                            |
|                                 |                                                                                                     | hNEC/hBEC          | SARS-CoV-2 <sup>S-Omicron</sup> Single<br>SARS-CoV-2 <sup>D614G</sup> vs SARS-CoV-2 <sup>S-Omicron</sup><br>Omicron-BA.1 vs SARS-CoV-2 <sup>S-Omicron</sup><br>SARS-CoV-2 <sup>S-Delta</sup> vs SARS-CoV-2 <sup>S-Omicron</sup>                             |
|                                 |                                                                                                     | PCLS               | SARS-CoV-2 <sup>S-Delta</sup> vs SARS-CoV-2 <sup>S-Omicron</sup>                                                                                                                                                                                            |
|                                 |                                                                                                     | hACE2-KI mice      | SARS-CoV-2 <sup>S-Delta</sup> vs SARS-CoV-2 <sup>S-Omicron</sup>                                                                                                                                                                                            |







# Supplementary Information Table 4

| Spike-Variant                   | Primer name                     | Primer sequence (5' to 3')                          | Amplification product (bp) | PCR Template (cDNA or YAC from previous clones)                          |
|---------------------------------|---------------------------------|-----------------------------------------------------|----------------------------|--------------------------------------------------------------------------|
| SARS-CoV-2S-Delta               | WU-19-F                         | GGAGTCACATTAATTGGAGAAGC                             | 1537                       | SpD614G                                                                  |
|                                 | CoV2-Sp-T19R-R                  | GTATGCAGGGGTAATTGAGTTCTGGTTCcTAAGATTAACACACTGACTAG  |                            |                                                                          |
|                                 | CoV2-Sp-T19R-F                  | CTAGTCAGTGTGTTAATCTTAAGAACCCAGAACTCAATTACCCCTGCATAC | 269                        | SpD614G                                                                  |
|                                 | CoV2-Sp-T95I-R                  | TATTATGTTAGACTTCTCAaTGGAAAGCAAAATAAACACCATCATTAAATG |                            |                                                                          |
|                                 | CoV2-Sp-T95I-F                  | TTTAATGATGGTGTATTATTTGCTTCCAITGAGAAGTCTAACATAATAAG  | 234                        | SpG142D                                                                  |
|                                 | CoV2-Sp-E156d-E157d-R158G-R1+R2 | GCAATTATTCGCACTAGAATAAACTCcACTTTCCATCCAACCTTTTGTG   |                            |                                                                          |
|                                 | CoV2-Sp-E156d-E157d-R158G-F1+F2 | CAAAAACAACAAAAGTTGGATGGAAAGTgGAGTTTATTCTAGTGCG      | 1199                       | SpL452R                                                                  |
|                                 | CoV2-Sp-T478K-R                 | CCTTCAACACCATTACAAGGTGTCTACCGGCCTGATAGATTTCAAGTTG   |                            |                                                                          |
|                                 | CoV2-Sp-T478K-F                 | CAACTGAAATCTATCAGGCCGTAGCAaACCTTGTAATGGTGTGAAGG     | 1468                       | SpD614G                                                                  |
|                                 | CoV2-Sp-D950N-R                 | GCTTGTGCACTTTGGTTGACCACATITGAAGTTTTCCAAGTGCACCTGC   |                            |                                                                          |
|                                 | CoV2-Sp-D950N-F                 | GCAAGTGCACCTGGAAAACCTCAaAATGTGGTCAACCAAAATGCACAAGC  | 1555                       | SpD614G                                                                  |
|                                 | WU-22-R                         | TCATGTTcAGAAATAGGACTTGTGG                           |                            |                                                                          |
| SARS-CoV-2 <sup>S-Omicron</sup> | WU-19-F                         | GGAGTCACATTAATTGGAGAAGC                             | 1203                       | SpD614G                                                                  |
|                                 | WU-60-R                         | TTGTTCCGCGTGGTTTGCCAAG                              |                            |                                                                          |
|                                 | WU-61-F                         | CTTGGAAATGCTGATCTTTATAAGC                           | 1221                       | cDNA of Omicron for Omicron spike and OmNTD; SpD614G for OmRBD and OmCS  |
|                                 | WU-62-R                         | TAGAAAAGTCTAGGTTGAAGATAAC                           |                            |                                                                          |
|                                 | WU-63-F                         | TTCGGCTTTAGAACCATTGGTAG                             | 1209                       | cDNA of Omicron for Omicron spike and OmRBD; SpD614G for OmNTD and OmCS  |
|                                 | CoV2-D614G-R                    | GCAACAGGGACTTCTGTGCAGTTAACACCTGATAAAGAAGCAACCTG     |                            |                                                                          |
|                                 | CoV2-D614G-F                    | CAGGTTGCTGTTCTTTATCAGGGTGTAACTGCACAGAAGTCCCTGTTGC   | 815                        | cDNA of Omicron for Omicron spike and OmCS ; SpD614G for OmNTD and OmRBD |
|                                 | WU-64-R                         | AACAGTGCAGAAGTGTATTGAGC                             |                            |                                                                          |
|                                 | WU-65-F                         | TGATTGCCTGGTGATATTGCTG                              | 1206                       | cDNA of Omicron for Omicron spike; SpD614G for OmNTD, OmRBD, OmCS        |
|                                 | WU-66-R                         | CAACTGGTCATACAGCAAAGCAT                             |                            |                                                                          |
|                                 | WU-67-F                         | GACATCTCTGGCATTAAATGCTTC                            | 877                        | SpD614G                                                                  |
|                                 | WU-22-R                         | TCATGTTcAGAAATAGGACTTGTGG                           |                            |                                                                          |

## Supplementary Information Table 5

| Assay Name                      | Oligo name       | Sequence (5' - 3')                           | Conc.      | Position |
|---------------------------------|------------------|----------------------------------------------|------------|----------|
| SARS-CoV-2-Alpha-S assay        | Alpha-S-22011-F  | AAA GTT GGA TGG AAA GTG AGT TCA              | 10 $\mu$ M | 22011    |
|                                 | SARS2-S-22132R   | CCT AAG ATT TTT GAA ATT ACC CTG T            | 10 $\mu$ M | 22132    |
|                                 | SARS2-S-22074FAM | FAM- TCT CTC AGC CTT TTC TTA TGG ACC T -BHQ1 | 5 $\mu$ M  | 22074    |
| SARS-CoV-2-Delta-S assay        | Delta-S-22011-F  | AAA GTT GGA TGG AAA GTG GAG                  | 10 $\mu$ M | 22011    |
|                                 | SARS2-S-22132R   | CCT AAG ATT TTT GAA ATT ACC CTG T            | 10 $\mu$ M | 22132    |
|                                 | SARS2-S-22074FAM | FAM- TCT CTC AGC CTT TTC TTA TGG ACC T -BHQ1 | 5 $\mu$ M  | 22074    |
| SARS-CoV-2-Omicron-BA.1-S assay | O-S22172-F       | TATTCTAAGCACACGCCTATTATAG                    | 10 $\mu$ M | 22172    |
|                                 | O-S22280-R       | TAGTGATGTTAATACCTATTGGCAAATC                 | 10 $\mu$ M | 22280    |
|                                 | O-S22202-FAM     | FAM-CGTGAGCCAGAAGATCTCCCTC-BHQ1              | 5 $\mu$ M  | 22202    |
